# Supplementary material for: Excited-state properties of fluorenones: influence of substituents, solvent and macrocyclic encapsulation
Source: Royal Society of Chemistry journal article supplement (doi:10.1039/c4cp01724b), 2014-01-01
Supplement: c4cp01724b1.pdf [file c4cp01724b1.pdf]

## Electronic Supplementary Information (ESI)

### Excited-State Properties of Fluorenones: Influence of Substituents, Solvent and Macrocyclic Encapsulation

Indrajit Ghosh,<sup>a</sup> Arindam Mukhopadhyay,<sup>b</sup> Apurba Lal Koner,<sup>a</sup> Subhas Samanta,<sup>b</sup> Werner M. Nau\*<sup>a</sup>  
and Jarugu Narasimha Moorthy\*<sup>b</sup>

<sup>a</sup> *Jacobs University Bremen, Campus Ring 1, D-28759 Bremen, Germany.*

*E-mail: [w.nau@jacobs-university.de](mailto:w.nau@jacobs-university.de)*

<sup>b</sup> *Department of Chemistry, Indian Institute of Technology Kanpur, Kanpur 208016, India.*

*E-mail: [moorthy@iitk.ac.in](mailto:moorthy@iitk.ac.in)*

#### Table of Contents

---

|    |                                                                                                                       |         |
|----|-----------------------------------------------------------------------------------------------------------------------|---------|
| 1. | Absorption and emission spectra of all fluorenones in different solvents.                                             | S2-S6   |
| 2. | Determination of the ground and excited state dipole moments for 2- and 3-methoxy fluorenones <b>2</b> and <b>3</b> . | S7- S20 |
| 3. | References                                                                                                            | S21     |

## 1 Absorption and Fluorescence Emission Spectra of Fluorenones in Different Solvents

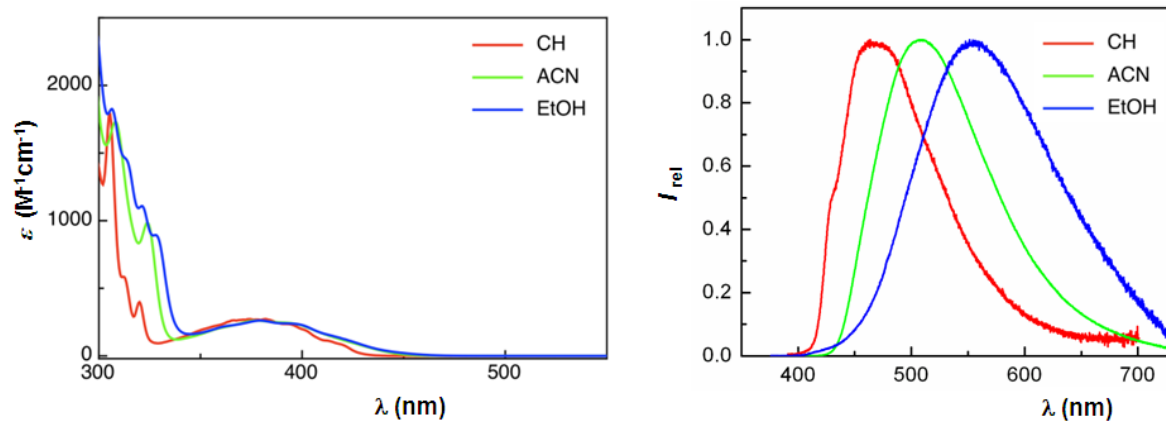

**Fig. S1** Absorption (left) and fluorescence emission spectra (right) of fluorenone 1 in cyclohexane (CH), acetonitrile (ACN), and ethanol (EtOH).

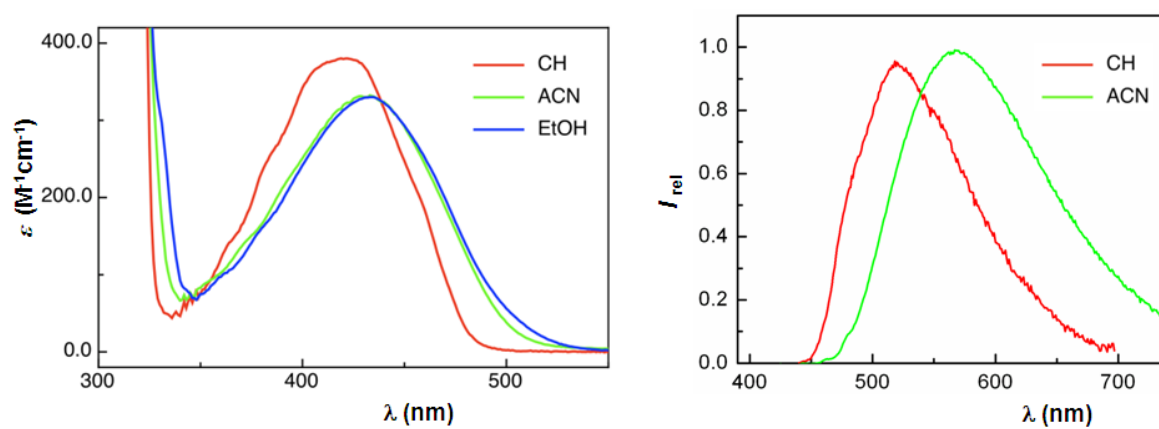

**Fig. S2** Absorption spectra (left) of fluorenone 2 in cyclohexane (CH), acetonitrile (ACN) and ethanol (EtOH), and fluorescence emission spectra (right) in cyclohexane (CH) and acetonitrile (ACN).

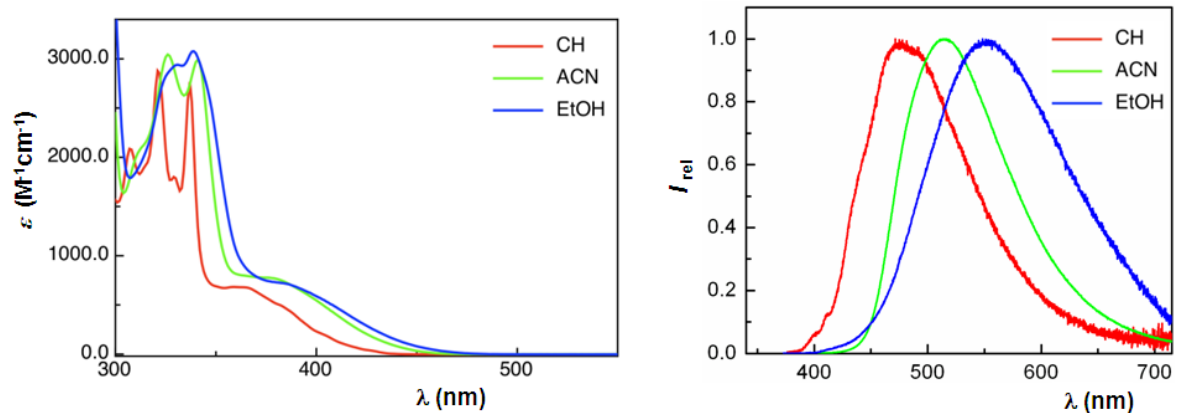

**Fig. S3** Absorption (left) and fluorescence emission spectra (right) of fluorenone 3 in cyclohexane (CH), acetonitrile (ACN) and ethanol (EtOH).

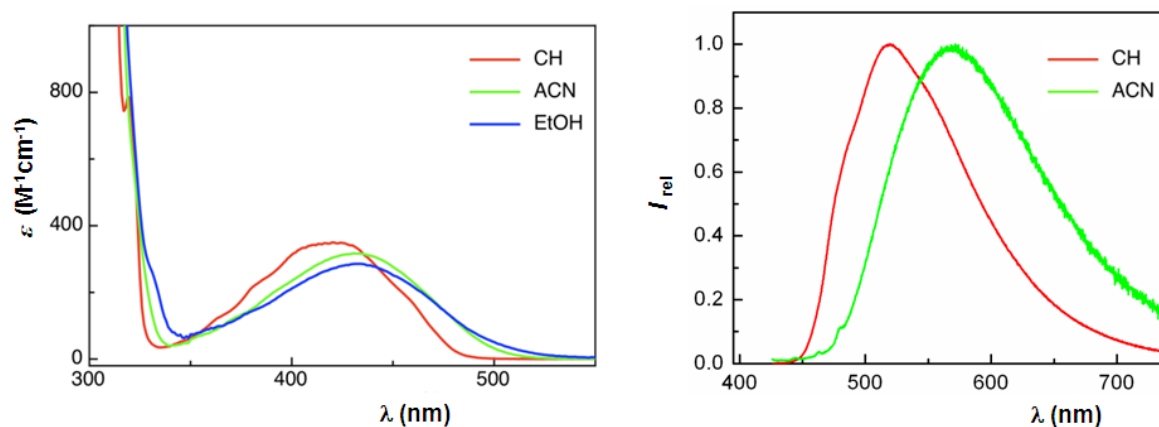

**Fig. S4** Absorption spectra (left) of fluorenone 4 in cyclohexane (CH), acetonitrile (ACN) and ethanol (EtOH), and fluorescence emission spectra (right) in cyclohexane (CH) and acetonitrile (ACN).

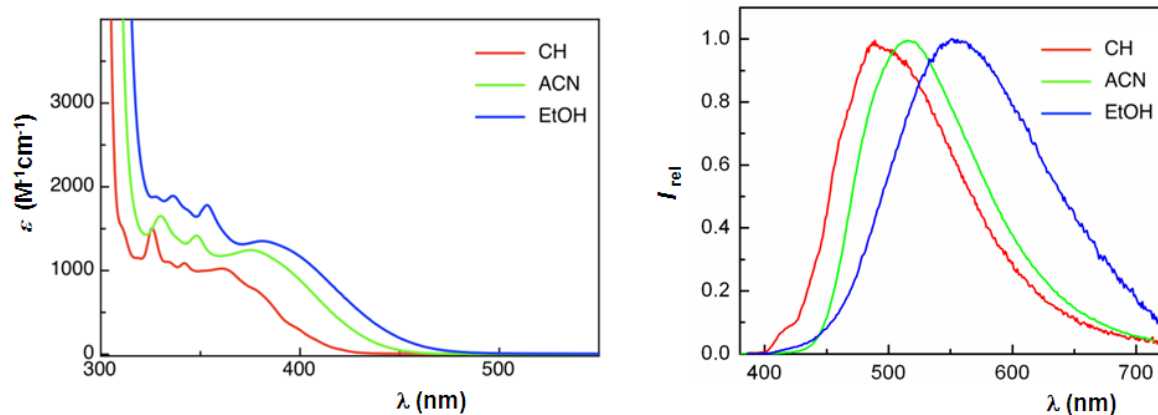

**Fig. S5** Absorption (left) and fluorescence emission spectra (right) of fluorenone **5** in cyclohexane (CH), acetonitrile (ACN), and ethanol (EtOH).

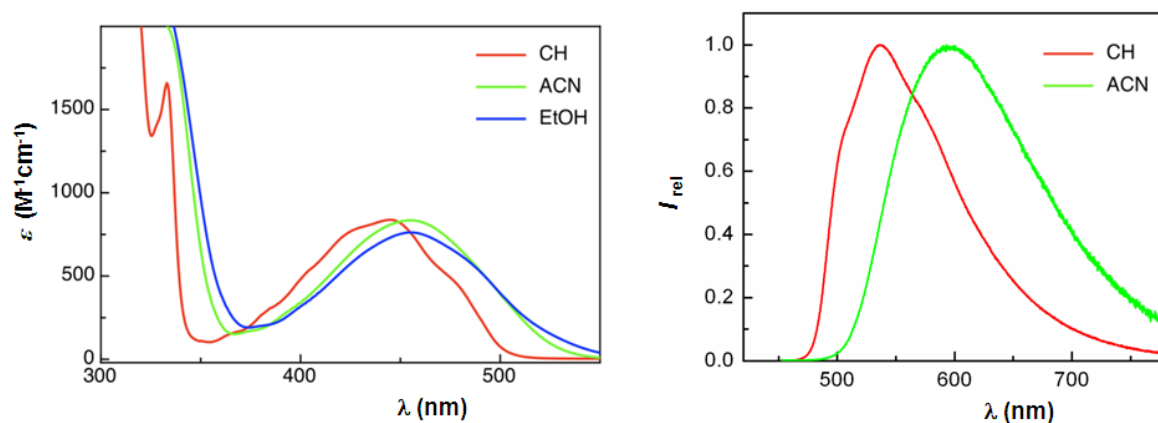

**Fig. S6** Absorption spectra (left) of fluorenone **6** in cyclohexane (CH), acetonitrile (ACN) and ethanol (EtOH), and fluorescence emission spectra (right) in cyclohexane (CH) and acetonitrile (ACN).

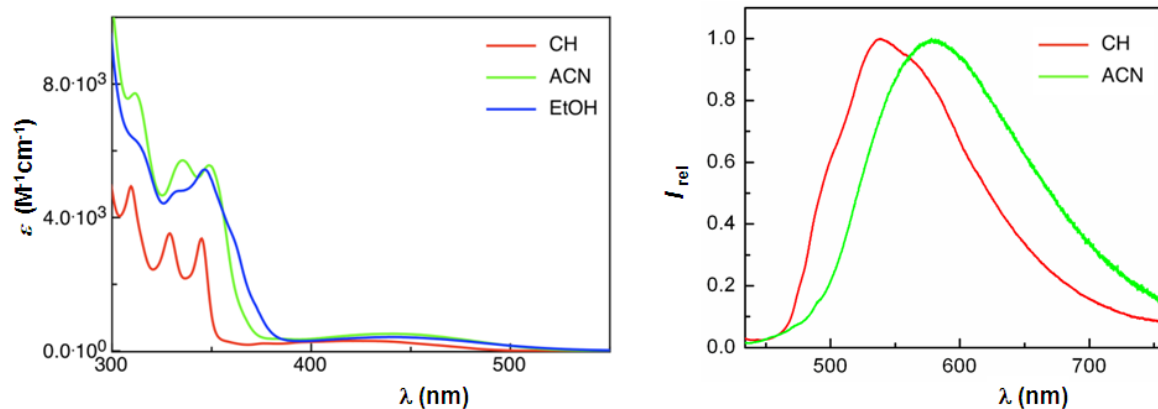

**Fig. S7** Absorption spectra (left) of fluorenone **7** in cyclohexane (CH), acetonitrile (ACN) and ethanol (EtOH), and fluorescence emission spectra (right) in cyclohexane (CH) and acetonitrile (ACN).

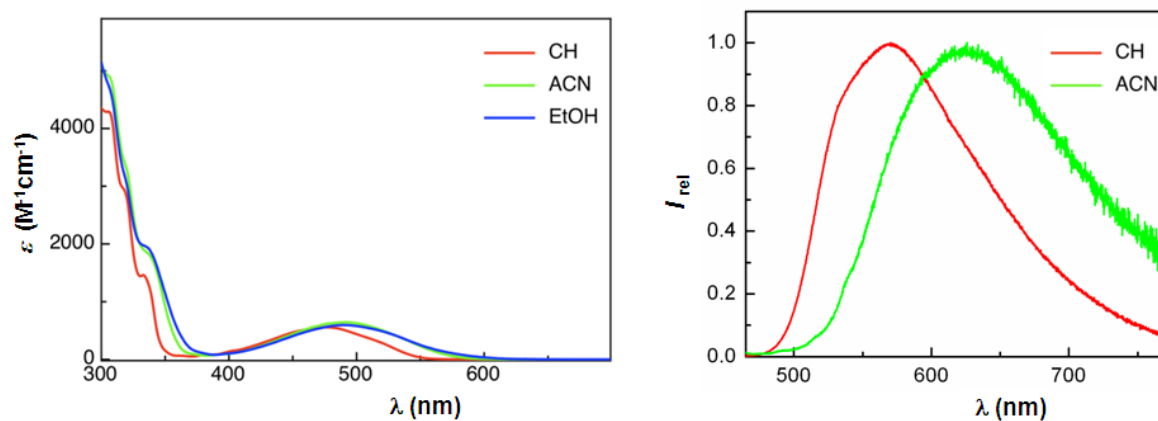

**Fig. S8** Absorption spectra (left) of fluorenone **8** in cyclohexane (CH), acetonitrile (ACN) and ethanol (EtOH), and fluorescence emission spectra (right) in cyclohexane (CH) and acetonitrile (ACN).

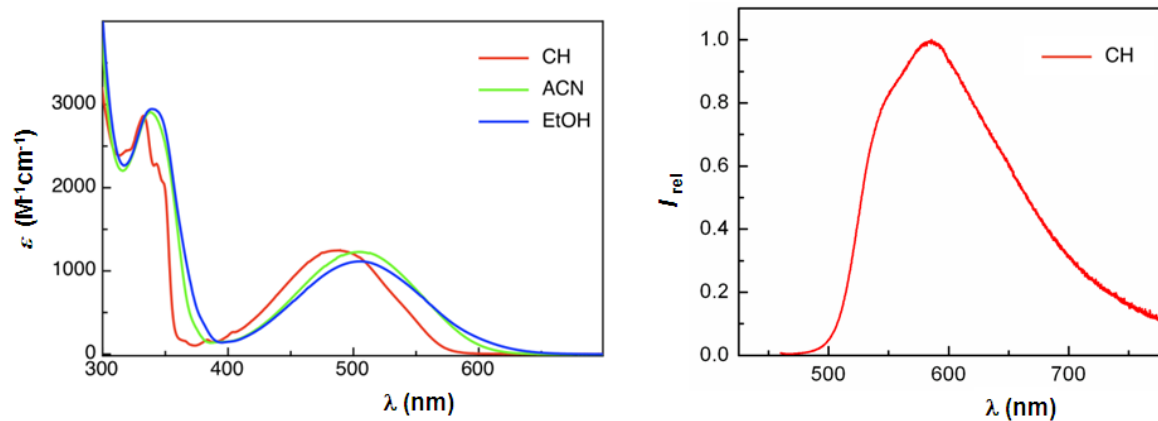

**Fig. S9** Absorption spectra (left) of fluorenone **2** in cyclohexane (CH), acetonitrile (ACN) and ethanol (EtOH), and fluorescence emission spectra (right) in cyclohexane (CH).

## 2 Determination of Ground and Excited State Dipole Moments of Methoxy-Substituted Regioisomeric Fluorenones 2 and 3: A Comparative Study

In general, the theory of solvent effects on the emission properties of fluorophores is based on the fact that the fluorophore molecule is considered as a dipole in a continuous medium of uniform dielectric constant and that this model necessarily does not contain any chemical interactions. However, the interactions between the solvent and fluorophore dipoles affect the energy difference between the ground and excited states, which in turn is responsible for spectral shifts. In this regard, the solvatochromic shifts in different solvents allow the estimation of ground ( $\mu_g$ ) and excited state ( $\mu_e$ ) dipole moments. The ratio of  $\mu_e$  and  $\mu_g$  can be determined by applying the Bakshiev formulation<sup>1</sup> (Eq. 1) and Chamma and Viallet equations<sup>2</sup> (Eq. 2).

The formulation of Bakshiev and Chamma and Viallet equations are based on simplified assumptions, e.g.,  $\mu_e$  and  $\mu_g$ , are almost collinear, the solute molecule is modelled as a spherical cavity with a rigid dipole at the centre and the cavity radius remains same both in the ground and excited states. These formulations ignore the molecular aspects of solvation.<sup>3</sup>

In accordance with the Bakshiev formulation,

$$\begin{aligned}\bar{\nu}_a - \bar{\nu}_f &= \frac{2(\mu_e - \mu_g)^2}{a^3 hc} f_1(D, n) + \text{constant} \\ &= S_1 f_1(D, n) + \text{constant} \quad \dots \text{Eq. 1}\end{aligned}$$

Where, the slope of the linear fit of  $(\bar{\nu}_a - \bar{\nu}_f)$  versus  $f_1(D, n)$  can be expressed by:

$$S_1 = \frac{2(\mu_e - \mu_g)^2}{a^3 hc}$$

Again, in accordance with the Chamma and Viallet equations, we have:

$$\begin{aligned} \frac{(\bar{\nu}_a + \bar{\nu}_f)}{2} &= -\frac{2(\mu_e^2 - \mu_g^2)}{a^3 hc} f_2(D, n) + \text{constant} \\ &= S_2 f_2(D, n) + \text{constant} \quad \dots \text{Eq. 2} \end{aligned}$$

Where, the slope of the linear fit of  $\frac{(\bar{\nu}_a + \bar{\nu}_f)}{2}$  versus  $f_2(D, n)$  can be expressed by:

$$S_2 = -\frac{2(\mu_e^2 - \mu_g^2)}{a^3 hc}$$

Here,  $\bar{\nu}_a$  and  $\bar{\nu}_f$  are respectively the absorption and fluorescence maxima,  $n$  and  $D$  are the refractive indices and the dielectric constants of the solvents, respectively, 'a' is the Onsager cavity radius (in Å) and 'c' and 'h' are the velocity of light and Planck's constant respectively.

The polarity functions  $f_1$  and  $f_2$  can be expressed as:

$$f_1(D, n) = \left[ \frac{D-1}{D+2} - \frac{n^2-1}{n^2+2} \right] \left( \frac{2n^2+1}{n^2+2} \right) \dots \dots \text{Eq. 3}$$

$$f_2(D, n) = \frac{1}{2} f_1(D, n) + \frac{3}{2} \frac{(n^4-1)}{(n^2+2)^2} \dots \dots \text{Eq. 4}$$

The numerical values of the functions  $f_1$  and  $f_2$  for different solvents have been shown in Table 1.

From Eq. 3 and Eq.4, we get the ratio of the dipole moment in the excited and ground states.

$$\boxed{\frac{\mu_e}{\mu_g} = \frac{|S_1 - S_2|}{|S_1 + S_2|}} \dots \dots \text{Eq. 5}$$

As can be seen from Eq. 5, the relation is independent of 'a', and this in fact points out that the ratio of  $\mu_e$  and  $\mu_g$  can be determined precisely without any knowledge of the Onsager cavity radius.<sup>3</sup>



In order to get a feel of polarization dependence of spectral profiles, however, the  $E_T(30)$  function, i.e. molar transition energy, which is an empirical measure of solvent polarity and is based on solvatochromic behaviour of a betaine dye as a probe solute, is of particular interest. However, to avoid certain dimensionality problems, the normalized  $E_T(30)$  function, viz.,  $E_T^N$  is often employed.<sup>3</sup> An empirical correlation of spectral shift with  $E_T^N$  has been developed by Ravi and co-workers,<sup>4</sup> according to which,

$$\bar{\nu}_a - \bar{\nu}_f = 11307.6 \left[ \left( \frac{\Delta\mu}{\Delta\mu_B} \right)^2 \left( \frac{a_B}{a} \right)^3 \right] E_T^N + \text{constant}$$

Where  $\Delta\mu_B$  and  $a_B$  designate dipole moment change on excitation and Onsager radius, respectively, for betaine dye. Similarly, the terms  $\Delta\mu$  and  $a$  are the corresponding values for the unknown molecule under study. The values of solute radii were in turn estimated by calculating the Van der Waals volumes ( $V_{vdw} = \frac{4}{3}\pi a^3$ ) using the technique developed by Michael H. Abraham and co-workers.<sup>5</sup> The values of  $E_T^N$  in different solvents are shown in Table 1.

A linear plot of the Stokes shift versus  $E_T^N$  results in the slope 'm' which can be expressed as:

$$m = 11307.6 \left[ \left( \frac{\Delta\mu}{\Delta\mu_B} \right)^2 \left( \frac{a_B}{a} \right)^3 \right]$$

For the probe molecule, betaine dye,<sup>6</sup>  $\Delta\mu_B = 9 D$  and  $a_B = 6.2 \text{ \AA}$ . With these values in hand, it turns out that

$$\Delta\mu = (\mu_e - \mu_g) = \sqrt{\frac{m \times 81}{11307.6 \left( \frac{6.2}{a} \right)^3}}$$

Thus, by knowing the ratio  $\frac{\mu_e}{\mu_g}$  and the difference  $(\mu_e - \mu_g)$ , the experimental values of ground and excited state dipole moments can be easily determined.<sup>3</sup>

We have employed the above protocol to determine the ground and excited state dipole moments for 2- and 3-methoxy fluorenones **2** and **3**. The detailed calculations are given in the following.

### 2.1 Determination of Onsager Cavity Radius for Regioisomeric Fluorenones **2** and **3**

The estimation of van der Waals volume ( $V_{vdw}$ ) for the helicenes was done theoretically using the atomic and bond contributions of van der Waals volume (VABC). According to Abraham and co-workers,<sup>5</sup> the van der Waals volume ( $\text{\AA}^3/\text{molecule}$ ) can be calculated from the following formula:

$$V_{vdw} = \sum (\text{all atom contributions}) - 5.92N_B - 14.7 R_A - 3.8 R_{NA}$$

where,  $N_B$  is the number of bonds,  $R_A$  is the number of aromatic rings, and  $R_{NA}$  is the number of non-romantic rings.

If the total number of atoms in the molecule is  $N$ , then the number of bonds present ( $N_B$ ) can be calculated using the relation:

$$N_B = N - 1 + R_A + R_{NA}$$

The van der Waals volumes<sup>5</sup> ( $V_{vdw}$ ) for carbon, hydrogen and oxygen are considered to be as 20.58, 7.24 and 14.71 Å<sup>3</sup> respectively. For both the fluorenones **2** and **3** the molecular formula is: C<sub>14</sub>H<sub>10</sub>O<sub>2</sub>. Thus, the sum of all atom contribution for each of these molecules turns out to be:

$$\begin{aligned}\Sigma(\text{all atom contributions}) &= (14 \times 20.58) + (10 \times 7.24) + (2 \times 14.71) \\ &= 288.12 + 72.4 + 29.42 \\ &= 389.94\end{aligned}$$

The number of bonds present in **2** or **3** can be calculated as:

$$\begin{aligned}N_B &= N - 1 + R_A + R_{NA} \\ &= (14 + 10 + 2) - 1 + 3 \\ &= 28\end{aligned}$$

Thus, the calculated van der Waals volumes ( $V_{vdw}$  in Å<sup>3</sup>) for **2** and **3** should be given by:

$$\begin{aligned}V_{vdw} &= \Sigma(\text{all atom contributions}) - 5.92N_B - 14.7 R_A - 3.8 R_{NA} \\ &= 389.94 - (5.92 \times 28) - (14.7 \times 3) - (3.8 \times 0) \\ &= 389.94 - 165.76 - 44.1 \\ &= 180.08\end{aligned}$$

Now, if we consider the Onsager radius to be 'a' (in Å) for a spherical molecule, then the van der Waals volume ( $V_{vdw}$  in Å<sup>3</sup>) can be regarded as,

$$V_{vdw} = \frac{4}{3} \pi a^3$$

Thus, for a molecule such as **2** or **3**, the relation turns out to be,

$$\frac{4}{3}\pi a^3 = 180.08$$

$$i. e., \quad a^3 = 180.08 \times \frac{3}{4\pi} = 42.99$$

$$\text{Thus, } a = 3.50 \text{ \AA}$$

## 2.2 Comparative Data for the Regioisomeric Fluorenones **2** and **3** as Polarity Probes

|                                                   |                                                |                                                |
|---------------------------------------------------|------------------------------------------------|------------------------------------------------|
| Fluorenone Probe                                  | <b>2</b>                                       | <b>3</b>                                       |
| Molecular Formula                                 | C <sub>14</sub> H <sub>10</sub> O <sub>2</sub> | C <sub>14</sub> H <sub>10</sub> O <sub>2</sub> |
| $\sum$ (all atom contributions)                   | 389.94                                         | 389.94                                         |
| $N_B$                                             | 28                                             | 28                                             |
| Van der Waals volume: $V_{vdw}$ (Å <sup>3</sup> ) | 180.08                                         | 180.08                                         |
| Onsager cavity radius: $a$ (Å)                    | 3.50                                           | 3.50                                           |

### 2.3 Estimation of Solvent Shift Data for Regioisomeric Fluorenones 2 and 3

**Table S1** Solvent Properties and Polarity Functions.

| Solvent      | Dielectric Constant (D) at 25 °C | Refractive Index (n) at 25 °C | Polarity Function $f_1(D, n)$ | Polarity Function $f_2(D, n)$ | $E_T^N$ (*) |
|--------------|----------------------------------|-------------------------------|-------------------------------|-------------------------------|-------------|
| Cyclohexane  | 1.88                             | 1.426                         | 0.036                         | 0.290                         | 0.150       |
| Benzene      | 2.28                             | 1.501                         | 0.005                         | 0.340                         | 0.117       |
| 1,4-Dioxane  | 2.25                             | 1.422                         | 0.05                          | 0.311                         | 0.164       |
| Ethylacetate | 6.02                             | 1.372                         | 0.489                         | 0.498                         | 0.228       |
| Acetonitrile | 37.5                             | 1.344                         | 0.865                         | 0.666                         | 0.472       |
| Ethanol      | 24.6                             | 1.361                         | 0.813                         | 0.652                         | 0.654       |

(\*) for standard values of  $E_T^N$  see ref. 7.

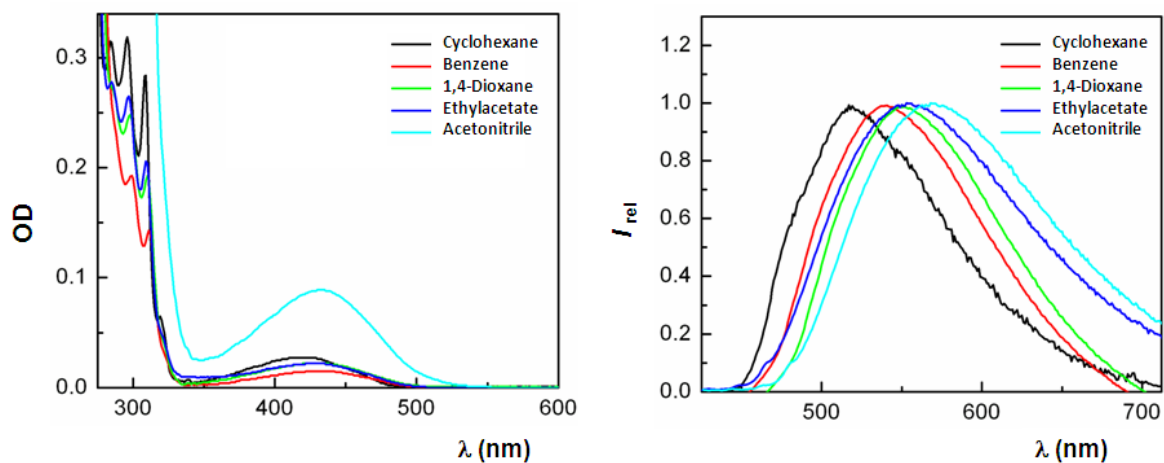

**Fig. S10** UV-vis absorption (left) and fluorescence (right) spectral profiles of fluorenone **2** in different solvents.

**Table S2** Solvent Shift Data for Fluorenone **2**.

| Solvent      | $\lambda_a$<br>(nm) | $\bar{\nu}_a$<br>( $\text{cm}^{-1}$ ) | $\lambda_f$<br>(nm) | $\bar{\nu}_f$<br>( $\text{cm}^{-1}$ ) | $(\bar{\nu}_a - \bar{\nu}_f)$<br>( $\text{cm}^{-1}$ ) | $(\bar{\nu}_a + \bar{\nu}_f)/2$<br>( $\text{cm}^{-1}$ ) |
|--------------|---------------------|---------------------------------------|---------------------|---------------------------------------|-------------------------------------------------------|---------------------------------------------------------|
| Cyclohexane  | 421.0               | 23752.97                              | 518.0               | 19305.02                              | 4447.95                                               | 21528.99                                                |
| Benzene      | 429.0               | 23310.02                              | 539.0               | 18552.88                              | 4757.13                                               | 20931.45                                                |
| 1,4-Dioxane  | 429.0               | 23310.02                              | 549.0               | 18214.94                              | 5095.08                                               | 20762.48                                                |
| Ethylacetate | 429.0               | 23310.02                              | 553.0               | 18083.18                              | 5226.84                                               | 20696.60                                                |
| Acetonitrile | 432.0               | 23148.15                              | 568.0               | 17605.63                              | 5542.52                                               | 20376.89                                                |

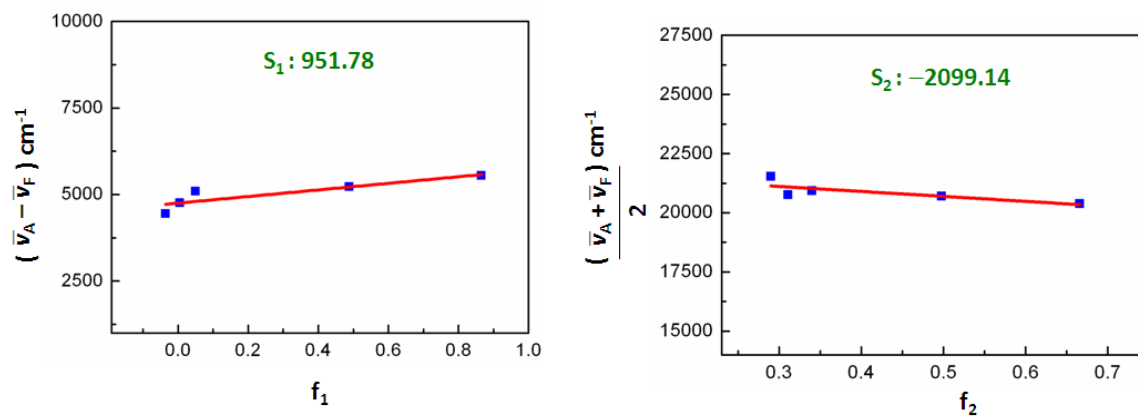

**Fig. S11** Plot of solvent shift data versus polarity functions  $f_1$  and  $f_2$  for different solvents using fluorenone **2** as the probe.

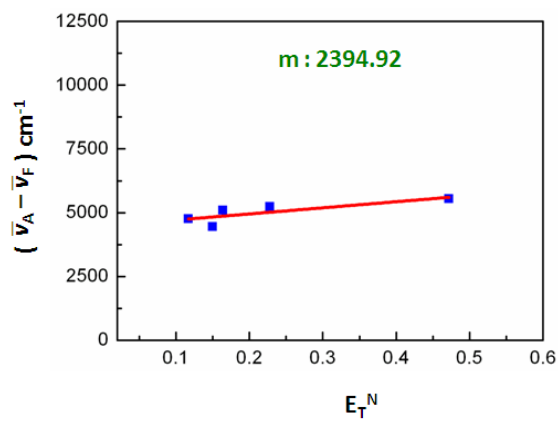

**Fig. S12** Plot of Stokes shift versus  $E_T^N$  for different solvents using fluorenone **2** as the polarity probe.

**Table S3** Experimentally Determined Dipole Moment Values of Fluorenone 2.

| Property                                                | Estimated Value |
|---------------------------------------------------------|-----------------|
| $S_1$                                                   | 951.78          |
| $S_2$                                                   | -2099.14        |
| $\frac{\mu_e}{\mu_g} = \frac{ S_1 - S_2 }{ S_1 + S_2 }$ | 2.66            |
| m                                                       | 2394.92         |
| $a$ (Å)                                                 | 3.5             |
| $\Delta\mu = (\mu_e - \mu_g)(D)$                        | 1.76            |
| $\mu_e$ (D)                                             | 2.82            |
| $\mu_g$ (D)                                             | 1.06            |



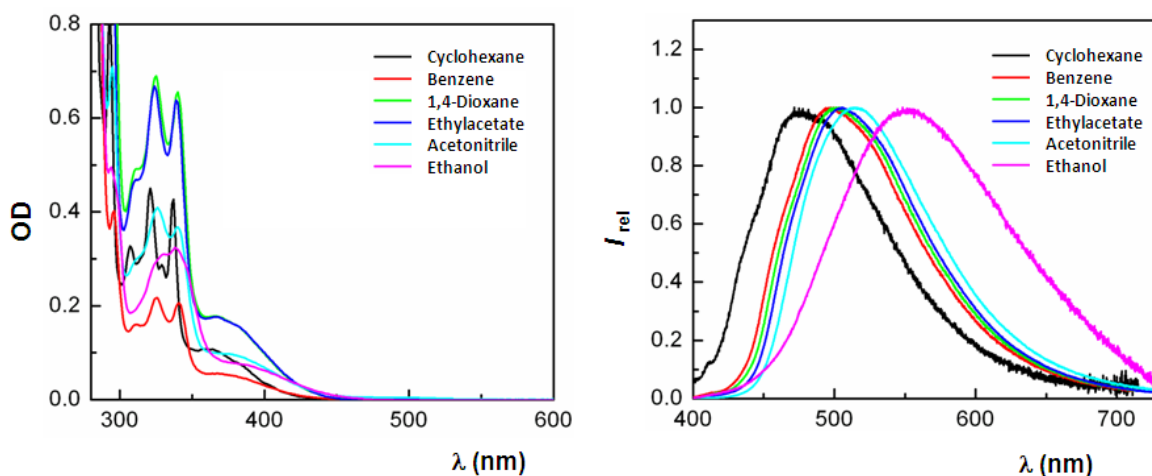

**Fig. S13** UV-vis absorption (left) and fluorescence (right) spectral profiles of fluorenone **3** in different solvents.

**Table S4** Solvent Shift Data for Fluorenone **3**.

| Solvent      | $\lambda_a$<br>(nm) | $\bar{\nu}_a$<br>( $\text{cm}^{-1}$ ) | $\lambda_f$<br>(nm) | $\bar{\nu}_f$<br>( $\text{cm}^{-1}$ ) | $(\bar{\nu}_a - \bar{\nu}_f)$<br>( $\text{cm}^{-1}$ ) | $(\bar{\nu}_a + \bar{\nu}_f)/2$<br>( $\text{cm}^{-1}$ ) |
|--------------|---------------------|---------------------------------------|---------------------|---------------------------------------|-------------------------------------------------------|---------------------------------------------------------|
| Cyclohexane  | 365.0               | 27397.26                              | 472.0               | 21186.44                              | 6210.82                                               | 24291.85                                                |
| Benzene      | 364.0               | 27472.52                              | 495.0               | 20202.02                              | 7270.5                                                | 23837.27                                                |
| 1,4-Dioxane  | 367.0               | 27247.96                              | 499.0               | 20040.01                              | 7207.95                                               | 23643.99                                                |
| Ethylacetate | 368.0               | 27173.91                              | 505.0               | 19801.98                              | 7371.93                                               | 23487.95                                                |
| Acetonitrile | 379.0               | 26385.22                              | 510.0               | 19607.80                              | 6777.42                                               | 22996.51                                                |
| Ethanol      | 387.0               | 25839.79                              | 549.0               | 18214.94                              | 7624.85                                               | 22027.37                                                |

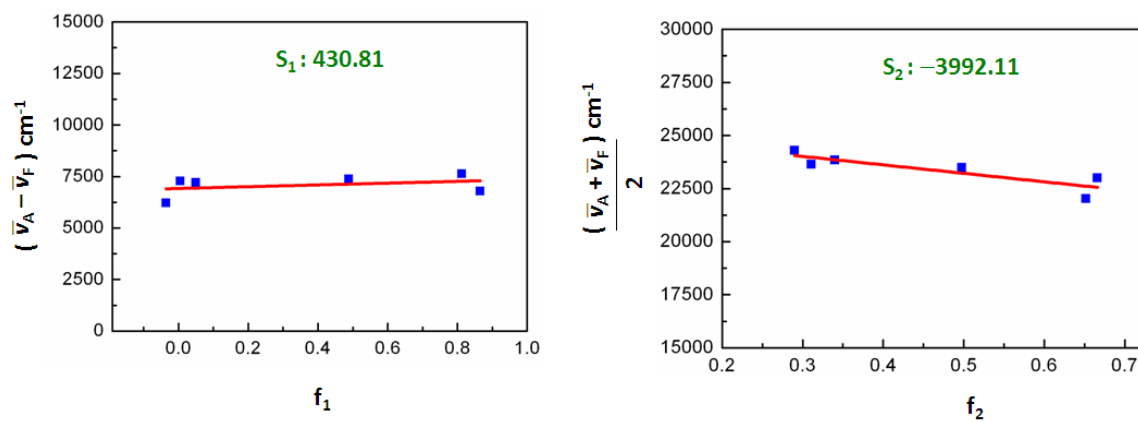

**Fig. S14** Plot of solvent shift data versus polarity functions  $f_1$  and  $f_2$  for different solvents using fluorenone **3** as the probe.

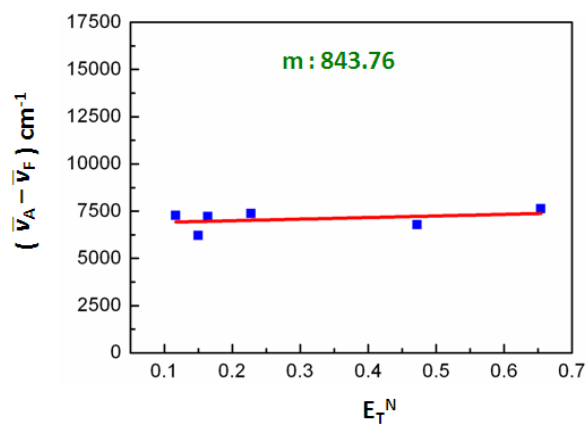

**Fig. S15** Plot of Stokes shift versus  $E_T^N$  for different solvents using fluorenone **3** as the polarity probe.

**Table S5** Experimentally Determined Dipole Moment Values of Fluorenone **3**.

| Property                                                | Estimated Value |
|---------------------------------------------------------|-----------------|
| $S_1$                                                   | 430.81          |
| $S_2$                                                   | -3992.11        |
| $\frac{\mu_e}{\mu_g} = \frac{ S_1 - S_2 }{ S_1 + S_2 }$ | 1.24            |
| m                                                       | 843.76          |
| $a$ (Å)                                                 | 3.5             |
| $\Delta\mu = (\mu_e - \mu_g)(D)$                        | 1.04            |
| $\mu_e$ (D)                                             | 5.37            |
| $\mu_g$ (D)                                             | 4.33            |

**Table S6** Comparative Experimental Data of the Dipole Moments of Fluorenones **2** and **3**.

| Property                                | Estimated Values    |                     |
|-----------------------------------------|---------------------|---------------------|
|                                         | Fluorenone <b>2</b> | Fluorenone <b>3</b> |
| $\mu_g(\text{D})$                       | 1.06                | 4.33                |
| $\mu_e(\text{D})$                       | 2.82                | 5.37                |
| $\frac{\mu_e}{\mu_g}$                   | 2.66                | 1.24                |
| $\Delta\mu = (\mu_e - \mu_g)(\text{D})$ | 1.76                | 1.04                |

## References

1. N. G. Bakshiev, *Opt. Spektosk. (USSR)*, 1964, **16**, 821.
2. A. Chamma and P. Viallet, *CR. Hebd. Seanc. Acad. Sci. Ser.*, 1970, **270**, 1901.
3. K. Chandrasekhar, L. R. Naik, H. M. Suresh Kumar and N. N. Math, *Ind. J. Pure Appl. Phys.*, 2006, **44**, 292.
4. (a) M. Ravi, A. Samanta and T. P. Radhakrishan, *J. Phys. Chem.*, 1994, **98**, 9133. (b) M. Ravi, T. Soujanya, A. Samanta and T. P. Radhakrishan, *J. Chem. Soc. Faraday Trans.*, 1995, **91**, 2739.
5. Y. H. Zhao, M. H. Abraham and A. M. Zissimos, *J. Org. Chem.*, 2003, **68**, 7368.
6. *Solvents and Solvent Effect in Organic Chemistry*; ed., C. Reichard, VCH, Weinheim, 1988.
7. S. Kumar, V. C. Rao and R. C. Rastogi, *Spectrochim. Acta*, 2001, **57 A**, 41.
